# Supplementary material for: Synthesis and characterization of MgF2–CoF2 binary fluorides. Influence of the treatment atmosphere and temperature on the structure and surface properties
Source: Royal Society of Chemistry journal article supplement (doi:10.1039/c8ra09365b), 2019-01-01
Supplement: c8ra09365b1.pdf [file c8ra09365b1.pdf]

## Supplementary Information

### Synthesis and characterization of $\text{MgF}_2\text{-CoF}_2$ binary fluorides. Influence of the treatment atmosphere and temperature on the structure and surface properties

Mariusz Pietrowski\*, Michał Zieliński, Emilia Alwin, Agata Suchora, Joanna Gawarecka

Faculty of Chemistry, Adam Mickiewicz University in Poznań,  
Umultowska 89B, 61-614 Poznań, Poland

Corresponding author, e-mail: mariop@amu.edu.pl

**Table S1** Photographs of  $\text{Mg}_x\text{Co}_{1-x}\text{F}_2$  binary fluorides after thermal treatment in reducing and oxidizing atmospheres.

| Sample   | Dried                                                                               | Reduced                                                                             |                                                                                     | Oxidized                                                                              |                                                                                       |
|----------|-------------------------------------------------------------------------------------|-------------------------------------------------------------------------------------|-------------------------------------------------------------------------------------|---------------------------------------------------------------------------------------|---------------------------------------------------------------------------------------|
|          | 120 °C                                                                              | 300 °C                                                                              | 400 °C                                                                              | 300 °C                                                                                | 400 °C                                                                                |
| Mg100    |  |  |  |  |  |
| MgCo0.6  |  |  |  |  |  |
| MgCo7.5  |  |  |  |  |  |
| MgCo37.7 |  |  |  |  |  |
| Co100    |  |  |  |  |  |

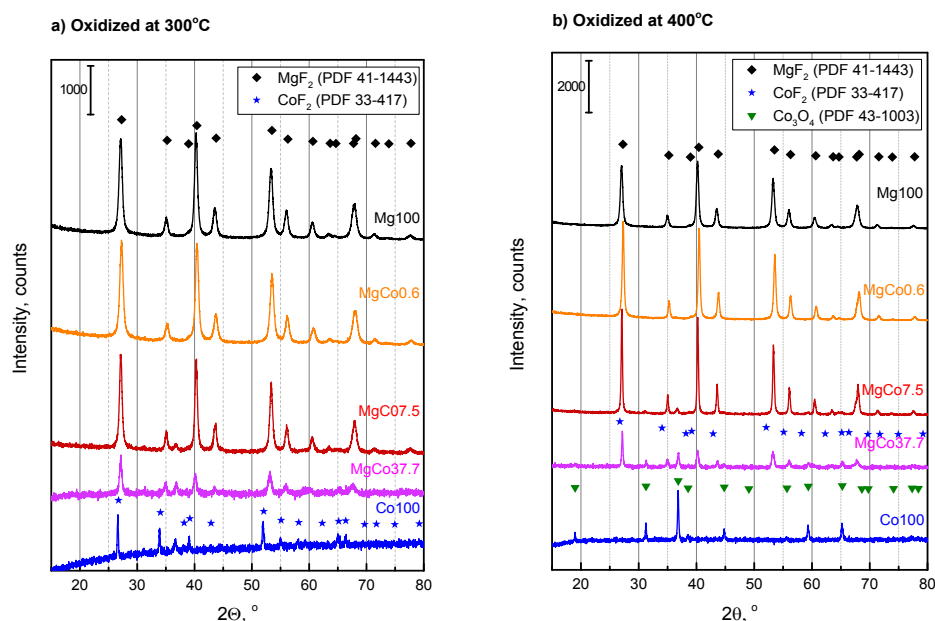

**Fig. S1** Powder diffraction patterns of  $Mg_xCo_{1-x}F_2$  binary fluorides calcined for 5h at 300°C (a) and 400°C (b).

In Figure S1 presented are X-ray powder diffraction patterns of the samples oxidized in air. Magnesium fluoride calcined at 300 °C (Mg100-Ox3) is characterized by a set of reflections typical of  $MgF_2$  (sellaite, PDF 41-1443) and has tetragonal structure ( $P4_2/mnm$ ). No other reflections (also from MgO), that could indicate the presence of other crystalline phases, were observed. The incorporation of  $CoF_2$  in the amount of 0.6 mol% did not result in changes in the XRD pattern. At a greater Co content (the MgCo7.5-Ox3 sample), the reflections became shifted towards smaller  $2\theta$  angles which indicates the replacement of  $Mg^{2+}$  ions by  $Co^{2+}$  ions. On the other hand, no magnesium-containing sample (Co100-Ox3) is characterized by the presence of reflections originating from  $CoF_2$  (PDF 33-417) and signals pointing to the presence of the  $Co_3O_4$  phase (PDF 43-1003). The oxide phase also appears in the XRD pattern of the MgCo7.5-Ox3 sample and its amount increases with increasing  $CoF_2$  content in the sample. In the diffraction pattern of MgCo37.7-Ox3 the aforementioned phase is discernible and in that of no magnesium-containing sample (Co100-Ox3) it is very clearly visible. After calcination at 400 °C, the presence of cobalt oxide becomes even more pronounced. Cobalt fluoride is not as stable as  $MgF_2$  and during the calcination it is gradually oxidized to  $Co_3O_4$ .

**Table S2** Values of a and c parameters for  $MgF_2$  and  $CoF_2$ , according to literature data and those obtained in this work.

| Fluoride | a, Å       | c, Å       | c/a    | Year | Ref.      |
|----------|------------|------------|--------|------|-----------|
| $MgF_2$  | 4.6218 (1) | 3.0534 (2) | 0.6606 | 1962 | 1         |
| $MgF_2$  | 4.6213 (1) | 3.0159 (1) | 0.6526 | 1971 | 2         |
| $MgF_2$  | 4.6213 (1) | 3.0519 (1) | 0.6604 | 1976 | 3         |
| $MgF_2$  | 4.628 (5)  | 3.045 (3)  | 0.6580 | 1981 | 4         |
| $MgF_2$  | 4.6233 (1) | 3.0522 (1) | 0.6602 | 1987 | 5         |
| $MgF_2$  | 4.6249 (1) | 3.0520 (1) | 0.6599 | 2001 | 6         |
| $MgF_2$  | 4.622 (7)  | 3.050 (3)  | 0.6599 | 2002 | 7         |
| $MgF_2$  | 4.6258 (6) | 3.0469 (4) | 0.6587 | 2012 | 8         |
| Mg100-R3 | 4.6214 (2) | 3.0413 (4) | 0.6581 | 2018 | this work |
| $CoF_2$  | 4.6951 (1) | 3.1796 (2) | 0.6772 | 1954 | 9         |
| $CoF_2$  | 4.6954 (4) | 3.1774 (4) | 0.6767 | 1971 | 2         |
| $CoF_2$  | 4.6950 (7) | 3.1817 (5) | 0.6777 | 1993 | 10        |
| $CoF_2$  | 4.6956 (5) | 3.1793 (5) | 0.6771 | 2001 | 11        |
| Co100-R3 | 4.6934 (3) | 3.1437 (5) | 0.6699 | 2018 | this work |

Parenthesized figures represent standard deviations of the least unit cited.

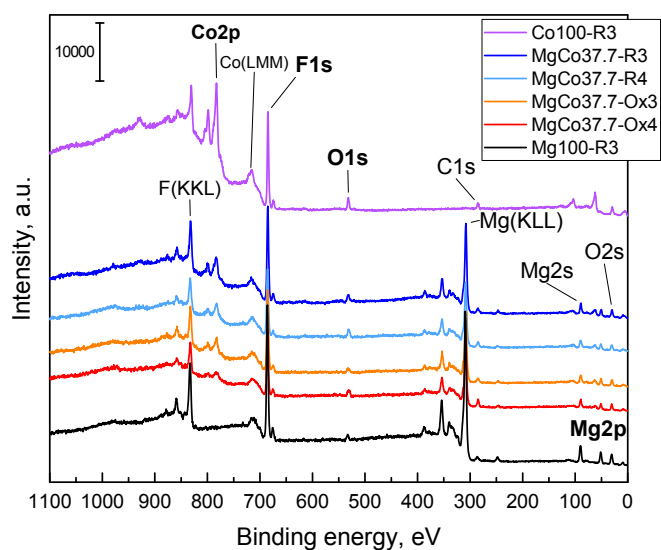

**Fig. S2** XPS survey spectra of  $\text{MgF}_2$ ,  $\text{CoF}_2$  and  $\text{Mg}_x\text{Co}_{1-x}\text{F}_2$  binary fluorides.

## References

1. K. V. K. Rao, S. V. N. Naidu and P. L. N. Setty, *Acta Crystallogr.*, 1962, **15**, 528-530.
2. W. H. Baur and A. A. Khan, *Acta Crystallogr. Sect. B: Struct. Sci.*, 1971, **B 27**, 2133-2139.
3. W. H. Baur, *Acta Crystallogr. Sect. B: Struct. Sci.*, 1976, **32**, 2200-2204.
4. J. P. Vidal, G. Vidal-Valat, M. Galtier and K. Kurkisuonio, *Acta Crystallogr. Sect. A: Found. Crystallogr.*, 1981, **37**, 826-837.
5. N. Nakagiri, M. H. Manghnani, Y. H. Kim and L. C. Ming, in *High-Pressure Research in Mineral Physics: A Volume in Honor of Syun-iti Akimoto*, American Geophysical Union, 2013, DOI: 10.1029/GM039p0281, pp. 281-287.
6. J. Haines, J. M. Leger, F. Gorelli, D. D. Klug, J. S. Tse and Z. Q. Li, *Phys. Rev. B: Condens. Matter*, 2001, **64**, 1341101-13411010.
7. J. L. Booster, J. H. L. Voncken, A. van Sandwijk and M. A. Reuter, *Powder Diffr.*, 2002, **17**, 112-118.
8. A. Demourgues, N. Penin, D. Dambournet, R. Clarenc, A. Tressaud and E. Durand, *J. Fluorine Chem.*, 2012, **134**, 35-43.
9. J. W. Stout and S. A. Reed, *J. Am. Chem. Soc.*, 1954, **76**, 5279-5281.
10. M. M. R. Costa, J. A. Paixao, M. J. M. Dealmeida and L. C. R. Andrade, *Phys. Rev. B: Condens. Matter*, 1993, **49**, 591-599.
11. N. J. O'Toole and V. A. Streltsov, *Acta Crystallogr. Sect. B: Struct. Sci.*, 2001, **57**, 128-135.
